# Supplementary material
Source: MDPI journal article supplement (https://www.mdpi.com/1424-2818/15/1/23)
Supplement: s1 [file s1 › TableS1[1].xlsx]

## Sheet: TableS1
Table S1: Taxonomic classification of the amplicon sequence variants (ASVs) found in Bufo bufo tadpole gut in Hungary. “NA” stands for "not available". “P” is the p-value corrected for false discovery rate from Kruskal-Wallis tests comparing the relative abundance of each ASV among three habitat types (natural, agricultural, and urban); P>0.05 values are highlighted in bold font. “Median” is the …
ASV	Phylum	Class	Order	Family	Genus	Species	P	Median
1	Bacteroidota	Bacteroidia	Bacteroidales	Rikenellaceae	dgA-11 gut group	NA	0.174092	167
2	Proteobacteria	Alphaproteobacteria	Rhodospirillales	Magnetospirillaceae	NA	NA	0.265135	28
3	Fusobacteriota	Fusobacteriia	Fusobacteriales	Fusobacteriaceae	Cetobacterium	NA	0.0902471	53
4	Bacteroidota	Bacteroidia	Bacteroidales	Bacteroidaceae	Bacteroides	NA	0.175415	83
5	Desulfobacterota	Desulfovibrionia	Desulfovibrionales	Desulfovibrionaceae	Desulfovibrio	NA	0.0384691	17
6	Proteobacteria	Gammaproteobacteria	Aeromonadales	Aeromonadaceae	Aeromonas	NA	0.20068	7
7	Proteobacteria	Gammaproteobacteria	Pseudomonadales	Pseudomonadaceae	Pseudomonas	NA	0.384634	46
8	Bacteroidota	Bacteroidia	Bacteroidales	Bacteroidaceae	Bacteroides	NA	0.42297	36
9	Cyanobacteria	Cyanobacteriia	Synechococcales	Cyanobiaceae	Cyanobium PCC-6307	NA	0.305158	0
10	Verrucomicrobiota	Verrucomicrobiae	Chthoniobacterales	Chthoniobacteraceae	LD29	NA	0.0916983	0
11	Bacteroidota	Bacteroidia	Bacteroidales	Bacteroidaceae	Bacteroides	NA	0.42297	43
12	Bacteroidota	Bacteroidia	Bacteroidales	Tannerellaceae	Parabacteroides	NA	0.160167	15
13	Proteobacteria	Alphaproteobacteria	Rhodospirillales	NA	NA	NA	0.305158	17
14	Cyanobacteria	Cyanobacteriia	Chloroplast	NA	NA	NA	0.305158	0
15	Planctomycetota	Planctomycetes	Pirellulales	Pirellulaceae	NA	NA	0.174092	0
16	Bacteroidota	Bacteroidia	Bacteroidales	Bacteroidaceae	Bacteroides	NA	0.28478	48
17	Bacteroidota	Bacteroidia	Bacteroidales	Rikenellaceae	Alistipes	NA	0.796693	0
18	Proteobacteria	Gammaproteobacteria	Burkholderiales	Rhodocyclaceae	Dechloromonas	NA	0.42297	0
19	Bacteroidota	Bacteroidia	Bacteroidales	Barnesiellaceae	NA	NA	0.328837	10
20	Proteobacteria	Gammaproteobacteria	Burkholderiales	Sutterellaceae	NA	NA	0.0264979	9
21	Bacteroidota	Bacteroidia	Bacteroidales	Rikenellaceae	Rikenella	NA	0.0604482	0
22	Desulfobacterota	Desulfovibrionia	Desulfovibrionales	Desulfovibrionaceae	Desulfovibrio	NA	0.42297	23
23	Cyanobacteria	Cyanobacteriia	Synechococcales	Cyanobiaceae	Cyanobium PCC-6307	NA	0.0456931	0
24	Bacteroidota	Bacteroidia	Bacteroidales	Marinilabiliaceae	[Cytophaga] xylanolytica group	NA	0.299079	0
25	Firmicutes	Clostridia	Lachnospirales	Lachnospiraceae	Tyzzerella	NA	0.361816	0
26	Firmicutes	NA	NA	NA	NA	NA	0.0264979	0
27	Firmicutes	Clostridia	NA	NA	NA	NA	0.42297	0
28	Fusobacteriota	Fusobacteriia	Fusobacteriales	Fusobacteriaceae	Cetobacterium	NA	0.193129	0
29	Firmicutes	NA	NA	NA	NA	NA	0.0914018	1
30	Bacteroidota	Bacteroidia	Bacteroidales	Rikenellaceae	Alistipes	NA	0.385748	12
31	Bacteroidota	Bacteroidia	Bacteroidales	Rs-E47 termite group	NA	NA	0.0477381	4
32	Cyanobacteria	Cyanobacteriia	Leptolyngbyales	Leptolyngbyaceae	NA	NA	0.0604482	0
33	Proteobacteria	Gammaproteobacteria	Alteromonadales	Shewanellaceae	Shewanella	NA	0.269393	3
34	Cyanobacteria	Cyanobacteriia	Synechococcales	Cyanobiaceae	Cyanobium PCC-6307	NA	0.153922	0
35	Proteobacteria	Alphaproteobacteria	Rhodospirillales	Magnetospirillaceae	NA	NA	0.42297	0
36	Proteobacteria	Gammaproteobacteria	Aeromonadales	Aeromonadaceae	Aeromonas	NA	0.448478	12
37	Firmicutes	Clostridia	Lachnospirales	Lachnospiraceae	Tyzzerella	NA	0.42297	0
38	Bacteroidota	Bacteroidia	Sphingobacteriales	ST-12K33	NA	NA	0.122081	0
39	Bacteroidota	Bacteroidia	Bacteroidales	Rikenellaceae	Rikenella	NA	0.42297	0
40	Firmicutes	Clostridia	NA	NA	NA	NA	0.608034	3
41	Bacteroidota	Bacteroidia	Bacteroidales	Bacteroidaceae	Bacteroides	NA	0.733831	0
42	Spirochaetota	Brevinematia	Brevinematales	Brevinemataceae	Brevinema	NA	0.201236	0
43	Bacteroidota	Bacteroidia	Bacteroidales	NA	NA	NA	0.61732	0
44	Bacteroidota	Bacteroidia	Bacteroidales	Bacteroidaceae	Bacteroides	NA	0.46143	5
45	Proteobacteria	Gammaproteobacteria	Burkholderiales	Rhodocyclaceae	Propionivibrio	NA	0.113887	9
46	Firmicutes	Clostridia	Peptostreptococcales-Tissierellales	Anaerovoracaceae	Anaerovorax	NA	0.176693	9
47	Bacteroidota	Bacteroidia	Bacteroidales	NA	NA	NA	0.0801103	0
48	Firmicutes	Clostridia	Lachnospirales	Lachnospiraceae	Anaerostignum	NA	0.42297	0
49	Spirochaetota	Brevinematia	Brevinematales	Brevinemataceae	Brevinema	NA	0.193129	0
50	Planctomycetota	Planctomycetes	Pirellulales	Pirellulaceae	Roseimaritima	NA	0.106221	0
51	Firmicutes	Clostridia	Lachnospirales	Lachnospiraceae	Tyzzerella	NA	0.0628439	0
52	Bacteroidota	Bacteroidia	Bacteroidales	Rikenellaceae	Rikenella	NA	0.193129	7
53	Firmicutes	Clostridia	NA	NA	NA	NA	0.175415	5
54	Bacteroidota	Bacteroidia	Bacteroidales	Bacteroidaceae	Bacteroides	NA	0.42297	0
55	Actinobacteriota	Actinobacteria	Corynebacteriales	Mycobacteriaceae	Mycobacterium	NA	0.0264979	0
56	Firmicutes	Clostridia	Oscillospirales	Ruminococcaceae	NA	NA	0.656212	7
57	Firmicutes	Clostridia	Lachnospirales	Lachnospiraceae	Tyzzerella	NA	0.42297	5
58	Bacteroidota	Bacteroidia	Bacteroidales	Prevotellaceae	Prevotellaceae Ga6A1 group	NA	0.42297	5
59	Proteobacteria	Gammaproteobacteria	Burkholderiales	Rhodocyclaceae	Propionivibrio	NA	0.0610688	0
60	Proteobacteria	Gammaproteobacteria	Burkholderiales	Rhodocyclaceae	NA	NA	0.42297	0
61	Proteobacteria	Alphaproteobacteria	Rhodospirillales	NA	NA	NA	0.264231	0
62	Cyanobacteria	Cyanobacteriia	Chloroplast	NA	NA	NA	0.132375	0
63	Proteobacteria	Gammaproteobacteria	Enterobacterales	Morganellaceae	Proteus	NA	0.457497	0
64	Verrucomicrobiota	Verrucomicrobiae	Chthoniobacterales	Terrimicrobiaceae	Terrimicrobium	NA	0.106106	0
65	Bacteroidota	Bacteroidia	Bacteroidales	Dysgonomonadaceae	Proteiniphilum	NA	0.42297	0
66	Proteobacteria	Alphaproteobacteria	Rhizobiales	Rhizobiales Incertae Sedis	NA	NA	0.42297	5
67	Bacteroidota	Bacteroidia	Bacteroidales	Rikenellaceae	Rikenella	NA	0.698563	0
68	Bacteroidota	Bacteroidia	Bacteroidales	Rikenellaceae	Alistipes	NA	0.305158	0
69	Cyanobacteria	Cyanobacteriia	Chloroplast	NA	NA	NA	0.384634	0
70	Proteobacteria	Gammaproteobacteria	Burkholderiales	Rhodocyclaceae	Dechloromonas	hortensis	0.0466209	0
71	Bacteroidota	Bacteroidia	Bacteroidales	Paludibacteraceae	Paludibacter	NA	0.225646	0
72	Cyanobacteria	Cyanobacteriia	Synechococcales	Cyanobiaceae	Cyanobium PCC-6307	NA	0.0604482	0
73	Firmicutes	Clostridia	Lachnospirales	Lachnospiraceae	Tyzzerella	NA	0.469988	2
74	Bacteroidota	Bacteroidia	Bacteroidales	Rikenellaceae	NA	NA	0.168313	0
75	Firmicutes	Clostridia	Oscillospirales	Ruminococcaceae	NA	NA	0.328224	0
76	Bacteroidota	Bacteroidia	Bacteroidales	Rikenellaceae	Alistipes	NA	0.413076	0
77	Verrucomicrobiota	Verrucomicrobiae	Chthoniobacterales	Chthoniobacteraceae	LD29	NA	0.0386246	0
78	Bacteroidota	Bacteroidia	Bacteroidales	Bacteroidaceae	Bacteroides	NA	0.887046	2
79	Proteobacteria	Gammaproteobacteria	Pseudomonadales	Moraxellaceae	Acinetobacter	NA	0.42297	0
80	Actinobacteriota	Actinobacteria	Corynebacteriales	Mycobacteriaceae	Mycobacterium	NA	0.0963089	0
81	Firmicutes	Clostridia	Lachnospirales	Lachnospiraceae	Anaerostignum	NA	0.892301	5
82	Planctomycetota	Planctomycetes	Pirellulales	Pirellulaceae	NA	NA	0.0604482	0
83	Firmicutes	Negativicutes	NA	NA	NA	NA	0.941084	0
84	Cyanobacteria	Cyanobacteriia	Leptolyngbyales	Leptolyngbyaceae	JSC-12	NA	0.101954	0
85	Bacteroidota	Bacteroidia	Bacteroidales	Barnesiellaceae	NA	NA	0.42297	0
86	Firmicutes	Negativicutes	Acidaminococcales	Acidaminococcaceae	Succinispira	NA	0.547595	0
87	Proteobacteria	Alphaproteobacteria	Rhodospirillales	NA	NA	NA	0.42297	0
88	Firmicutes	Clostridia	Oscillospirales	Ruminococcaceae	Candidatus Soleaferrea	NA	0.235114	4
89	Verrucomicrobiota	Verrucomicrobiae	Verrucomicrobiales	NA	NA	NA	0.615758	0
90	NA	NA	NA	NA	NA	NA	0.384634	0
91	Firmicutes	Clostridia	Oscillospirales	Ruminococcaceae	Paludicola	NA	0.953415	0
92	Bacteroidota	Bacteroidia	Bacteroidales	Rikenellaceae	Rikenella	NA	0.0264979	0
93	Firmicutes	Negativicutes	Acidaminococcales	Acidaminococcaceae	Succinispira	NA	0.195625	0
94	Cyanobacteria	Cyanobacteriia	Cyanobacteriales	Microcystaceae	NA	NA	0.101954	0
95	Deferribacterota	Deferribacteres	Deferribacterales	Deferribacteraceae	Mucispirillum	NA	0.42297	0
96	Bacteroidota	Bacteroidia	Flavobacteriales	Flavobacteriaceae	Flavobacterium	NA	0.0604482	0
97	Bacteroidota	Bacteroidia	Bacteroidales	Rikenellaceae	Mucinivorans	NA	0.0610688	0
98	Bacteroidota	Bacteroidia	Bacteroidales	Rikenellaceae	Rikenella	NA	0.42297	0
99	Proteobacteria	Gammaproteobacteria	Cellvibrionales	Halieaceae	OM60(NOR5) clade	NA	0.20068	0
100	Firmicutes	Clostridia	Oscillospirales	Ruminococcaceae	NA	NA	0.175346	0
101	Bacteroidota	Bacteroidia	Bacteroidales	Rikenellaceae	Mucinivorans	NA	0.305158	0
102	Firmicutes	Clostridia	Lachnospirales	Lachnospiraceae	Tyzzerella	NA	0.42297	0
103	Bacteroidota	Bacteroidia	Bacteroidales	Rikenellaceae	NA	NA	0.101954	0
104	Firmicutes	Clostridia	Oscillospirales	Ruminococcaceae	Paludicola	NA	0.545366	3
105	Proteobacteria	Alphaproteobacteria	Rhizobiales	Beijerinckiaceae	Methylobacterium-Methylorubrum	NA	0.0384691	0
106	Proteobacteria	Gammaproteobacteria	Burkholderiales	Sutterellaceae	NA	NA	0.101954	0
107	Bacteroidota	Bacteroidia	Bacteroidales	Tannerellaceae	Parabacteroides	NA	0.42297	0
108	Proteobacteria	Alphaproteobacteria	Rhodobacterales	Rhodobacteraceae	NA	NA	0.384634	0
109	Actinobacteriota	Actinobacteria	PeM15	NA	NA	NA	0.0384691	0
110	Firmicutes	Clostridia	Oscillospirales	Ruminococcaceae	Candidatus Soleaferrea	NA	0.42297	0
111	Firmicutes	Clostridia	Oscillospirales	Ruminococcaceae	NA	NA	0.660547	0
112	Firmicutes	Clostridia	Oscillospirales	Ruminococcaceae	Paludicola	NA	0.0604482	0
113	Bacteroidota	Bacteroidia	Bacteroidales	NA	NA	NA	0.201236	0
114	Firmicutes	Clostridia	Oscillospirales	UCG-010	NA	NA	0.42297	0
115	Proteobacteria	Gammaproteobacteria	Cellvibrionales	Halieaceae	OM60(NOR5) clade	NA	0.195625	0
116	Proteobacteria	Gammaproteobacteria	Alteromonadales	Shewanellaceae	Shewanella	NA	0.0264979	0
117	Firmicutes	Negativicutes	Acidaminococcales	Acidaminococcaceae	Succinispira	NA	0.42297	0
118	Bacteroidota	Bacteroidia	Bacteroidales	NA	NA	NA	0.0264979	0
119	Bacteroidota	Bacteroidia	Bacteroidales	NA	NA	NA	0.42297	0
120	Cyanobacteria	Cyanobacteriia	Synechococcales	Cyanobiaceae	Cyanobium PCC-6307	NA	0.0610688	0
121	Bacteroidota	Bacteroidia	Bacteroidales	Bacteroidaceae	Bacteroides	NA	0.0563592	0
122	Bacteroidota	Bacteroidia	NA	NA	NA	NA	0.42297	0
123	Verrucomicrobiota	Verrucomicrobiae	Chthoniobacterales	Chthoniobacteraceae	LD29	NA	0.42297	0
124	Planctomycetota	Planctomycetes	Gemmatales	Gemmataceae	NA	NA	0.101954	0
125	Verrucomicrobiota	Verrucomicrobiae	Chthoniobacterales	Chthoniobacteraceae	LD29	NA	0.0604482	0
126	Bacteroidota	Bacteroidia	Bacteroidales	Rikenellaceae	Rikenella	NA	0.42297	0
127	Bacteroidota	Bacteroidia	Bacteroidales	Rikenellaceae	Mucinivorans	NA	0.742366	0
128	Planctomycetota	Planctomycetes	Pirellulales	Pirellulaceae	NA	NA	0.360508	0
129	Bacteroidota	Bacteroidia	Sphingobacteriales	NA	NA	NA	0.20068	0
130	Proteobacteria	Gammaproteobacteria	Burkholderiales	Sutterellaceae	NA	NA	0.20068	0
131	Desulfobacterota	Desulfovibrionia	Desulfovibrionales	Desulfovibrionaceae	Desulfovibrio	NA	0.320105	0
132	Desulfobacterota	Desulfovibrionia	Desulfovibrionales	Desulfovibrionaceae	Desulfovibrio	NA	0.61732	0
133	Bacteroidota	Bacteroidia	Bacteroidales	NA	NA	NA	0.304606	0
134	Cyanobacteria	Cyanobacteriia	Synechococcales	Cyanobiaceae	Cyanobium PCC-6307	gracile	0.0264979	0
135	Firmicutes	Clostridia	Oscillospirales	Butyricicoccaceae	UCG-009	NA	0.21946	0
136	Proteobacteria	Gammaproteobacteria	Enterobacterales	Budviciaceae	Budvicia	NA	0.664962	0
137	Desulfobacterota	Desulfovibrionia	Desulfovibrionales	Desulfovibrionaceae	Desulfovibrio	NA	0.0386246	0
138	Firmicutes	Clostridia	Oscillospirales	Ruminococcaceae	NA	NA	0.328224	0
139	Bacteroidota	Bacteroidia	Bacteroidales	Rikenellaceae	Rikenella	NA	0.174063	0
140	Bacteroidota	Bacteroidia	Bacteroidales	Tannerellaceae	Parabacteroides	NA	0.176693	0
141	Firmicutes	Clostridia	Lachnospirales	Lachnospiraceae	Tyzzerella	NA	0.193129	0
142	Cyanobacteria	Cyanobacteriia	Chloroplast	NA	NA	NA	0.101954	0
143	Planctomycetota	Planctomycetes	Pirellulales	Pirellulaceae	NA	NA	0.132375	0
144	Proteobacteria	Gammaproteobacteria	Pseudomonadales	Moraxellaceae	Acinetobacter	NA	0.20068	0
145	Firmicutes	Clostridia	Lachnospirales	Lachnospiraceae	NA	NA	0.370519	0
146	Firmicutes	Clostridia	Peptostreptococcales-Tissierellales	Anaerovoracaceae	NA	NA	0.174092	0
147	Desulfobacterota	Desulfovibrionia	Desulfovibrionales	Desulfovibrionaceae	Desulfovibrio	NA	0.176693	0
148	Desulfobacterota	Desulfovibrionia	Desulfovibrionales	Desulfovibrionaceae	Desulfovibrio	NA	0.174092	0
149	Actinobacteriota	Actinobacteria	PeM15	NA	NA	NA	0.772402	0
150	Proteobacteria	Gammaproteobacteria	Arenicellales	Arenicellaceae	NA	NA	0.086813	0
151	Proteobacteria	Gammaproteobacteria	Burkholderiales	Rhodocyclaceae	NA	NA	0.0264979	0
152	Bacteroidota	Bacteroidia	Bacteroidales	Bacteroidaceae	Bacteroides	NA	0.42297	0
153	Desulfobacterota	Desulfovibrionia	Desulfovibrionales	Desulfovibrionaceae	Desulfovibrio	NA	0.42297	0
154	Firmicutes	Clostridia	NA	NA	NA	NA	0.106106	0
155	Firmicutes	Clostridia	Lachnospirales	Lachnospiraceae	Tyzzerella	NA	0.35056	0
156	Bacteroidota	Bacteroidia	Bacteroidales	Rikenellaceae	Rikenella	NA	0.42297	0
157	Bacteroidota	Bacteroidia	Bacteroidales	Barnesiellaceae	NA	NA	0.906676	0
158	Planctomycetota	Planctomycetes	Pirellulales	Pirellulaceae	NA	NA	0.0902471	0
159	Bacteroidota	Bacteroidia	Bacteroidales	Barnesiellaceae	NA	NA	0.42297	0
160	Cyanobacteria	Vampirivibrionia	Gastranaerophilales	NA	NA	NA	0.193129	0
161	Proteobacteria	Gammaproteobacteria	Steroidobacterales	Steroidobacteraceae	NA	NA	0.157519	0
162	Firmicutes	Negativicutes	Acidaminococcales	Acidaminococcaceae	Succinispira	NA	0.590164	0
163	Bacteroidota	Bacteroidia	Bacteroidales	Prevotellaceae	NA	NA	0.28715	0
164	Planctomycetota	Planctomycetes	Pirellulales	Pirellulaceae	NA	NA	0.42297	0
165	Cyanobacteria	Cyanobacteriia	Synechococcales	Cyanobiaceae	Cyanobium PCC-6307	NA	0.0386246	0
166	Firmicutes	Clostridia	Peptostreptococcales-Tissierellales	Anaerovoracaceae	NA	NA	0.611223	0
167	Firmicutes	Clostridia	Oscillospirales	Ruminococcaceae	NA	NA	0.42297	0
168	Desulfobacterota	Desulfovibrionia	Desulfovibrionales	Desulfovibrionaceae	NA	NA	0.176693	0
169	Bacteroidota	Bacteroidia	Bacteroidales	Prevotellaceae	NA	NA	0.0610688	0
170	Bacteroidota	Bacteroidia	Bacteroidales	Paludibacteraceae	NA	NA	0.35056	0
171	Proteobacteria	Alphaproteobacteria	Rhodospirillales	NA	NA	NA	0.42297	0
172	Deferribacterota	Deferribacteres	Deferribacterales	Deferribacteraceae	Mucispirillum	NA	0.0971716	0
173	Planctomycetota	Planctomycetes	Pirellulales	Pirellulaceae	NA	NA	0.239156	0
174	Bacteroidota	Bacteroidia	Bacteroidales	Rikenellaceae	NA	NA	0.0604482	0
175	Actinobacteriota	Actinobacteria	Corynebacteriales	Mycobacteriaceae	Mycobacterium	NA	0.086813	0
176	Firmicutes	Clostridia	Oscillospirales	Ruminococcaceae	Angelakisella	NA	0.799028	0
177	Firmicutes	Clostridia	Clostridia UCG-014	NA	NA	NA	0.42297	0
178	Bacteroidota	Bacteroidia	Bacteroidales	Barnesiellaceae	NA	NA	0.42297	0
179	Firmicutes	Clostridia	Oscillospirales	Ruminococcaceae	Harryflintia	NA	0.42297	0
180	Firmicutes	Clostridia	Monoglobales	Monoglobaceae	Monoglobus	NA	0.0802179	0
181	Planctomycetota	Planctomycetes	Pirellulales	Pirellulaceae	NA	NA	0.265135	0
182	Firmicutes	Clostridia	Oscillospirales	NA	NA	NA	0.918849	0
183	Firmicutes	Clostridia	Monoglobales	Monoglobaceae	Monoglobus	NA	0.528273	0
184	Campilobacterota	Campylobacteria	Campylobacterales	Arcobacteraceae	Arcobacter	cryaerophilus	0.42297	0
185	Bacteroidota	Bacteroidia	Bacteroidales	NA	NA	NA	0.0364639	0
186	Firmicutes	Clostridia	NA	NA	NA	NA	0.0610688	0
187	Firmicutes	Clostridia	Oscillospirales	Butyricicoccaceae	UCG-009	NA	0.456042	0
188	Proteobacteria	Alphaproteobacteria	Rhizobiales	Beijerinckiaceae	Methylocystis	NA	0.384634	0
189	Actinobacteriota	Thermoleophilia	Solirubrobacterales	67-14	NA	NA	0.193129	0
190	Proteobacteria	Gammaproteobacteria	Arenicellales	Arenicellaceae	NA	NA	0.086813	0
191	Firmicutes	Clostridia	Oscillospirales	Ruminococcaceae	NA	NA	0.731067	0
192	Planctomycetota	Planctomycetes	Isosphaerales	Isosphaeraceae	NA	NA	0.454638	0
193	Actinobacteriota	Actinobacteria	Corynebacteriales	Mycobacteriaceae	Mycobacterium	NA	0.175346	0
194	Actinobacteriota	Actinobacteria	Corynebacteriales	Mycobacteriaceae	Mycobacterium	NA	0.0604482	0
195	Firmicutes	Clostridia	Lachnospirales	Lachnospiraceae	Tyzzerella	NA	0.42297	0
196	Proteobacteria	Alphaproteobacteria	Rhodospirillales	NA	NA	NA	0.280723	0
197	Proteobacteria	Alphaproteobacteria	Sphingomonadales	Sphingomonadaceae	Polymorphobacter	fuscus	0.193129	0
198	Cyanobacteria	Cyanobacteriia	Synechococcales	Cyanobiaceae	Cyanobium PCC-6307	NA	0.0453099	0
199	Bacteroidota	Bacteroidia	Bacteroidales	NA	NA	NA	0.61732	0
200	Cyanobacteria	Cyanobacteriia	Synechococcales	Cyanobiaceae	Cyanobium PCC-6307	NA	0.42297	0
201	Proteobacteria	Gammaproteobacteria	Xanthomonadales	Xanthomonadaceae	Arenimonas	NA	0.61732	0
202	Desulfobacterota	Desulfovibrionia	Desulfovibrionales	Desulfovibrionaceae	Desulfovibrio	NA	0.42297	0
203	Verrucomicrobiota	Verrucomicrobiae	Verrucomicrobiales	Rubritaleaceae	Luteolibacter	NA	0.838292	0
204	Bacteroidota	Bacteroidia	Bacteroidales	NA	NA	NA	0.0515266	0
205	Bacteroidota	Bacteroidia	Bacteroidales	Rikenellaceae	Mucinivorans	NA	0.086813	0
206	Proteobacteria	Alphaproteobacteria	Rhizobiales	Beijerinckiaceae	Methylobacterium-Methylorubrum	NA	0.101954	0
207	Firmicutes	Clostridia	NA	NA	NA	NA	0.193129	0
208	Bacteroidota	Bacteroidia	Sphingobacteriales	ST-12K33	NA	NA	0.42297	0
209	Cyanobacteria	Cyanobacteriia	Chloroplast	NA	NA	NA	0.0604482	0
210	Actinobacteriota	Actinobacteria	Corynebacteriales	Mycobacteriaceae	Mycobacterium	NA	0.342328	0
211	Bacteroidota	Bacteroidia	Bacteroidales	Bacteroidaceae	Bacteroides	NA	0.42297	0
212	Proteobacteria	Gammaproteobacteria	Burkholderiales	Rhodocyclaceae	NA	NA	0.305158	0
213	Proteobacteria	Alphaproteobacteria	Rhodobacterales	Rhodobacteraceae	Rhodobacter	blasticus	0.0604482	0
214	Firmicutes	Clostridia	Oscillospirales	Ruminococcaceae	NA	NA	0.0916983	0
215	Firmicutes	Clostridia	Lachnospirales	Lachnospiraceae	Tyzzerella	NA	0.46143	0
216	Firmicutes	Clostridia	Oscillospirales	Ruminococcaceae	NA	NA	0.192716	0
217	Desulfobacterota	Desulfovibrionia	Desulfovibrionales	Desulfovibrionaceae	Desulfovibrio	NA	0.174092	0
218	Bacteroidota	Bacteroidia	Bacteroidales	Barnesiellaceae	NA	NA	0.101954	0
219	Proteobacteria	Gammaproteobacteria	Burkholderiales	Rhodocyclaceae	Z-35	NA	0.42297	0
220	Firmicutes	Clostridia	NA	NA	NA	NA	0.42297	0
221	Proteobacteria	Alphaproteobacteria	Rickettsiales	NA	NA	NA	0.42297	0
222	Bacteroidota	Bacteroidia	Bacteroidales	Paludibacteraceae	Paludibacter	NA	0.42297	0
223	Proteobacteria	Gammaproteobacteria	Methylococcales	Methylococcaceae	Methyloparacoccus	NA	0.175346	0
224	Bacteroidota	Bacteroidia	Bacteroidales	NA	NA	NA	0.193129	0
225	Proteobacteria	Gammaproteobacteria	NA	NA	NA	NA	0.375748	0
226	Firmicutes	Clostridia	Oscillospirales	Ruminococcaceae	Paludicola	NA	0.42297	0
227	Firmicutes	Clostridia	Lachnospirales	Lachnospiraceae	Tyzzerella	NA	0.42297	0
228	Desulfobacterota	Desulfovibrionia	Desulfovibrionales	Desulfovibrionaceae	Desulfovibrio	NA	0.42297	0
229	Firmicutes	Clostridia	Clostridia vadinBB60 group	NA	NA	NA	0.201236	0
230	Planctomycetota	Planctomycetes	Planctomycetales	NA	NA	NA	0.193129	0
231	Firmicutes	Clostridia	Oscillospirales	Ruminococcaceae	Paludicola	NA	0.42297	0
232	Bacteroidota	Bacteroidia	Bacteroidales	Rikenellaceae	Rikenella	NA	0.384634	0
233	Fusobacteriota	Fusobacteriia	Fusobacteriales	Fusobacteriaceae	Cetobacterium	NA	0.42297	0
234	Firmicutes	Clostridia	Oscillospirales	Ruminococcaceae	NA	NA	0.42297	0
235	Bacteroidota	Bacteroidia	Bacteroidales	Rikenellaceae	Rikenella	NA	0.42297	0
236	Verrucomicrobiota	Verrucomicrobiae	Chthoniobacterales	Chthoniobacteraceae	Chthoniobacter	NA	0.42297	0
237	Verrucomicrobiota	Verrucomicrobiae	Verrucomicrobiales	Verrucomicrobiaceae	NA	NA	0.20068	0
238	Firmicutes	Clostridia	NA	NA	NA	NA	0.42297	0
239	Firmicutes	Bacilli	Mycoplasmatales	Mycoplasmataceae	NA	NA	0.0604482	0
240	Deferribacterota	Deferribacteres	Deferribacterales	Deferribacteraceae	Mucispirillum	NA	0.42297	0
241	Actinobacteriota	Actinobacteria	Corynebacteriales	Mycobacteriaceae	Mycobacterium	NA	0.0453099	0
242	Deferribacterota	Deferribacteres	Deferribacterales	Deferribacteraceae	Mucispirillum	NA	0.42297	0
243	Firmicutes	Clostridia	Clostridia vadinBB60 group	NA	NA	NA	0.42297	0
244	Planctomycetota	Planctomycetes	Pirellulales	Pirellulaceae	NA	NA	0.193129	0
245	Firmicutes	Clostridia	Oscillospirales	Ruminococcaceae	NA	NA	0.608034	0
246	Proteobacteria	Alphaproteobacteria	Rhodospirillales	NA	NA	NA	0.101954	0
247	Firmicutes	Clostridia	Oscillospirales	Ruminococcaceae	NA	NA	0.42297	0
248	Firmicutes	Clostridia	Oscillospirales	Ruminococcaceae	Pygmaiobacter	NA	0.42297	0
249	Proteobacteria	Gammaproteobacteria	Burkholderiales	Rhodocyclaceae	NA	NA	0.299079	0
250	Firmicutes	Clostridia	Lachnospirales	Lachnospiraceae	Tyzzerella	NA	0.42297	0
251	Proteobacteria	Gammaproteobacteria	Cellvibrionales	Halieaceae	OM60(NOR5) clade	NA	0.466471	0
252	Firmicutes	Clostridia	Oscillospirales	Ruminococcaceae	NA	NA	0.201236	0
253	NA	NA	NA	NA	NA	NA	0.227069	0
254	Firmicutes	Clostridia	Lachnospirales	Lachnospiraceae	Tyzzerella	NA	0.61732	0
255	Firmicutes	Clostridia	Peptostreptococcales-Tissierellales	Anaerovoracaceae	NA	NA	0.42297	0
256	Firmicutes	Clostridia	Lachnospirales	Lachnospiraceae	Tyzzerella	NA	0.42297	0
257	Firmicutes	Clostridia	Peptococcales	Peptococcaceae	Desulfitispora	NA	0.0610688	0
258	Firmicutes	Clostridia	Lachnospirales	Lachnospiraceae	Tyzzerella	NA	0.42297	0
259	Verrucomicrobiota	Verrucomicrobiae	Verrucomicrobiales	Rubritaleaceae	Luteolibacter	NA	0.395706	0
260	Firmicutes	Clostridia	Lachnospirales	Lachnospiraceae	Tyzzerella	NA	0.42297	0
261	Bacteroidota	Bacteroidia	Bacteroidales	Barnesiellaceae	NA	NA	0.42297	0
262	Actinobacteriota	Actinobacteria	PeM15	NA	NA	NA	0.42297	0
263	NA	NA	NA	NA	NA	NA	0.193129	0
264	Bacteroidota	Bacteroidia	Bacteroidales	Rikenellaceae	Alistipes	NA	0.42297	0
265	Firmicutes	Clostridia	Oscillospirales	Ruminococcaceae	NA	NA	0.42297	0
266	Proteobacteria	Gammaproteobacteria	Burkholderiales	Comamonadaceae	Limnohabitans	NA	0.42297	0
267	Proteobacteria	Alphaproteobacteria	Sphingomonadales	Sphingomonadaceae	Sphingorhabdus	rigui	0.42297	0
268	Planctomycetota	Planctomycetes	Gemmatales	Gemmataceae	NA	NA	0.42297	0
269	Firmicutes	Clostridia	Lachnospirales	Lachnospiraceae	NA	NA	0.42297	0
270	Firmicutes	Clostridia	Lachnospirales	Lachnospiraceae	Tyzzerella	NA	0.42297	0
271	Proteobacteria	Alphaproteobacteria	Rhodobacterales	Rhodobacteraceae	Rhodobacter	NA	0.42297	0
272	Verrucomicrobiota	Verrucomicrobiae	Verrucomicrobiales	Akkermansiaceae	Akkermansia	NA	0.42297	0
273	Planctomycetota	Planctomycetes	Pirellulales	Pirellulaceae	Pirellula	NA	0.193129	0
274	Bacteroidota	Bacteroidia	NA	NA	NA	NA	0.101954	0
275	Firmicutes	Clostridia	Oscillospirales	Ruminococcaceae	NA	NA	0.42297	0
276	Desulfobacterota	Desulfovibrionia	Desulfovibrionales	Desulfovibrionaceae	Desulfovibrio	NA	0.42297	0
277	Deferribacterota	Deferribacteres	Deferribacterales	Deferribacteraceae	Mucispirillum	NA	0.431972	0
278	Bacteroidota	Bacteroidia	Bacteroidales	Rikenellaceae	Alistipes	NA	0.328224	0
279	Bacteroidota	Bacteroidia	Bacteroidales	Muribaculaceae	NA	NA	0.42297	0
280	Firmicutes	Clostridia	Oscillospirales	Ruminococcaceae	NA	NA	0.42297	0
281	Proteobacteria	Gammaproteobacteria	Steroidobacterales	Steroidobacteraceae	NA	NA	0.375106	0
282	Cyanobacteria	Cyanobacteriia	Chloroplast	NA	NA	NA	0.42297	0
283	Firmicutes	Clostridia	Oscillospirales	Ruminococcaceae	NA	NA	0.42297	0
284	Firmicutes	Clostridia	Lachnospirales	Lachnospiraceae	Tyzzerella	NA	0.42297	0
285	Planctomycetota	Planctomycetes	Pirellulales	Pirellulaceae	NA	NA	0.086813	0
286	Actinobacteriota	Thermoleophilia	Solirubrobacterales	67-14	NA	NA	0.0386246	0
287	Firmicutes	Clostridia	Lachnospirales	Lachnospiraceae	Tyzzerella	NA	0.42297	0
288	Bacteroidota	Bacteroidia	Bacteroidales	NA	NA	NA	0.42297	0
289	Firmicutes	Clostridia	Lachnospirales	Lachnospiraceae	Tyzzerella	NA	0.42297	0
290	Proteobacteria	Alphaproteobacteria	Acetobacterales	Acetobacteraceae	Roseomonas	NA	0.42297	0
291	Proteobacteria	Gammaproteobacteria	Steroidobacterales	Steroidobacteraceae	NA	NA	0.42297	0
292	Bacteroidota	Bacteroidia	Bacteroidales	Rs-E47 termite group	NA	NA	0.42297	0
293	Firmicutes	Clostridia	Oscillospirales	NA	NA	NA	0.375106	0
294	Firmicutes	Clostridia	Oscillospirales	Ruminococcaceae	Paludicola	NA	0.42297	0
295	Cyanobacteria	Cyanobacteriia	Synechococcales	Cyanobiaceae	Cyanobium PCC-6307	NA	0.42297	0
296	Chloroflexi	Anaerolineae	Caldilineales	Caldilineaceae	NA	NA	0.42297	0
297	Firmicutes	Clostridia	Oscillospirales	NA	NA	NA	0.201236	0
298	Firmicutes	Clostridia	Lachnospirales	Lachnospiraceae	Tyzzerella	NA	0.42297	0
299	Proteobacteria	Gammaproteobacteria	Burkholderiales	Comamonadaceae	NA	NA	0.42297	0
300	Actinobacteriota	Actinobacteria	Corynebacteriales	Mycobacteriaceae	Mycobacterium	NA	0.101954	0
301	Firmicutes	Clostridia	Oscillospirales	NA	NA	NA	0.42297	0
302	Bacteroidota	Bacteroidia	Bacteroidales	NA	NA	NA	0.42297	0
303	Firmicutes	Clostridia	Clostridia vadinBB60 group	NA	NA	NA	0.987189	0
304	Proteobacteria	Alphaproteobacteria	Paracaedibacterales	Paracaedibacteraceae	NA	NA	0.42297	0
305	Bacteroidota	Bacteroidia	Bacteroidales	Rikenellaceae	Mucinivorans	NA	0.35056	0
306	Proteobacteria	Gammaproteobacteria	Burkholderiales	Comamonadaceae	Acidovorax	NA	0.42297	0
307	Desulfobacterota	Desulfovibrionia	Desulfovibrionales	Desulfovibrionaceae	Desulfovibrio	NA	0.42297	0
308	Proteobacteria	NA	NA	NA	NA	NA	0.42297	0
309	Cyanobacteria	Cyanobacteriia	Cyanobacteriales	Microcystaceae	Microcystis PCC-7914	NA	0.42297	0
310	Firmicutes	Clostridia	Clostridia vadinBB60 group	NA	NA	NA	0.42297	0
311	Bacteroidota	Bacteroidia	Bacteroidales	Rikenellaceae	Rikenella	NA	0.42297	0
312	Proteobacteria	NA	NA	NA	NA	NA	0.42297	0
313	Actinobacteriota	Actinobacteria	Micrococcales	Microbacteriaceae	Aurantimicrobium	minutum	0.42297	0
314	Firmicutes	Clostridia	Oscillospirales	Ruminococcaceae	NA	NA	0.42297	0
315	Bacteroidota	Bacteroidia	Bacteroidales	Rs-E47 termite group	NA	NA	0.42297	0
316	Actinobacteriota	Acidimicrobiia	Microtrichales	Microtrichaceae	IMCC26207	NA	0.193129	0
317	Firmicutes	Clostridia	Lachnospirales	Lachnospiraceae	Tyzzerella	NA	0.42297	0
318	Proteobacteria	Alphaproteobacteria	Rhodospirillales	NA	NA	NA	0.42297	0
319	Bacteroidota	Bacteroidia	Bacteroidales	Rikenellaceae	Rikenella	NA	0.42297	0
320	Bacteroidota	Bacteroidia	Bacteroidales	Bacteroidaceae	Bacteroides	NA	0.42297	0
321	Bacteroidota	Bacteroidia	Bacteroidales	Rikenellaceae	NA	NA	0.42297	0
322	Chloroflexi	Chloroflexia	Thermomicrobiales	JG30-KF-CM45	NA	NA	0.42297	0
323	Bacteroidota	Bacteroidia	Bacteroidales	Rikenellaceae	Rikenella	NA	0.42297	0
324	Proteobacteria	Gammaproteobacteria	SZB30	NA	NA	NA	0.42297	0
325	Proteobacteria	Alphaproteobacteria	Sphingomonadales	Sphingomonadaceae	Sphingorhabdus	NA	0.42297	0
326	Verrucomicrobiota	Verrucomicrobiae	Verrucomicrobiales	Rubritaleaceae	Luteolibacter	NA	0.42297	0
327	Euryarchaeota	Methanobacteria	Methanobacteriales	Methanobacteriaceae	Methanobacterium	NA	0.344355	0
328	Bacteroidota	Bacteroidia	Bacteroidales	Barnesiellaceae	NA	NA	0.42297	0
329	Bacteroidota	Bacteroidia	Bacteroidales	NA	NA	NA	0.42297	0
330	Cyanobacteria	Cyanobacteriia	Chloroplast	NA	NA	NA	0.42297	0
331	Proteobacteria	Gammaproteobacteria	Chromatiales	Chromatiaceae	Lamprocystis	NA	0.42297	0
332	Proteobacteria	Gammaproteobacteria	Enterobacterales	Enterobacteriaceae	Citrobacter	NA	0.42297	0
333	Firmicutes	Clostridia	NA	NA	NA	NA	0.42297	0
334	Campilobacterota	Campylobacteria	Campylobacterales	Sulfurospirillaceae	Sulfurospirillum	arsenophilum	0.42297	0
335	Cyanobacteria	Cyanobacteriia	Synechococcales	Cyanobiaceae	Cyanobium PCC-6307	NA	0.42297	0
336	Proteobacteria	Alphaproteobacteria	Rhizobiales	Rhizobiales Incertae Sedis	NA	NA	0.647507	0
337	Firmicutes	Clostridia	Clostridia vadinBB60 group	NA	NA	NA	0.42297	0
338	Firmicutes	Clostridia	Lachnospirales	Lachnospiraceae	Tyzzerella	NA	0.42297	0
339	Proteobacteria	Gammaproteobacteria	NA	NA	NA	NA	0.42297	0
340	Proteobacteria	Alphaproteobacteria	Holosporales	Holosporaceae	NA	NA	0.42297	0
341	Firmicutes	Clostridia	Lachnospirales	Lachnospiraceae	Tyzzerella	NA	0.42297	0
342	NA	NA	NA	NA	NA	NA	0.42297	0
343	Actinobacteriota	Actinobacteria	Corynebacteriales	Mycobacteriaceae	Mycobacterium	NA	0.375106	0
344	Proteobacteria	Alphaproteobacteria	Rhodospirillales	NA	NA	NA	0.42297	0
345	Firmicutes	Clostridia	Peptostreptococcales-Tissierellales	Anaerovoracaceae	Anaerovorax	NA	0.647507	0
346	Actinobacteriota	Actinobacteria	Corynebacteriales	Mycobacteriaceae	Mycobacterium	NA	0.375106	0
347	Actinobacteriota	Thermoleophilia	Solirubrobacterales	Solirubrobacteraceae	Conexibacter	NA	0.42297	0
348	Firmicutes	Bacilli	Erysipelotrichales	Erysipelotrichaceae	[Anaerorhabdus] furcosa group	NA	0.42297	0
349	Firmicutes	Clostridia	Oscillospirales	Ruminococcaceae	NA	NA	0.42297	0
350	Firmicutes	Clostridia	Oscillospirales	UCG-010	NA	NA	0.42297	0
351	Firmicutes	Clostridia	Clostridia vadinBB60 group	NA	NA	NA	0.42297	0
352	Bacteroidota	Bacteroidia	Bacteroidales	Rikenellaceae	Rikenella	NA	0.42297	0
353	Cyanobacteria	Cyanobacteriia	Synechococcales	Cyanobiaceae	Cyanobium PCC-6307	NA	0.42297	0
354	Firmicutes	Clostridia	Oscillospirales	NA	NA	NA	0.42297	0
355	Cyanobacteria	Cyanobacteriia	Synechococcales	Cyanobiaceae	Cyanobium PCC-6307	NA	0.42297	0
356	NA	NA	NA	NA	NA	NA	0.42297	0
357	Proteobacteria	NA	NA	NA	NA	NA	0.42297	0
358	Cyanobacteria	Vampirivibrionia	Gastranaerophilales	NA	NA	NA	0.42297	0
359	Proteobacteria	Gammaproteobacteria	Burkholderiales	Rhodocyclaceae	Dechloromonas	NA	0.328224	0
360	Firmicutes	Clostridia	Lachnospirales	Lachnospiraceae	Tyzzerella	NA	0.42297	0
361	Firmicutes	Clostridia	NA	NA	NA	NA	0.42297	0
362	Firmicutes	Clostridia	NA	NA	NA	NA	0.42297	0
363	Bacteroidota	Bacteroidia	Chitinophagales	Chitinophagaceae	Dinghuibacter	NA	0.42297	0
364	Firmicutes	Clostridia	Oscillospirales	Ruminococcaceae	NA	NA	0.42297	0
365	Firmicutes	Clostridia	Lachnospirales	Lachnospiraceae	Tyzzerella	NA	0.42297	0
366	Proteobacteria	Alphaproteobacteria	Rhodospirillales	NA	NA	NA	0.42297	0
367	Firmicutes	Clostridia	Oscillospirales	Ruminococcaceae	NA	NA	0.42297	0
368	Bacteroidota	Bacteroidia	Bacteroidales	Tannerellaceae	Parabacteroides	NA	0.42297	0
369	Bacteroidota	Bacteroidia	Bacteroidales	NA	NA	NA	0.42297	0
370	Firmicutes	Clostridia	Peptostreptococcales-Tissierellales	Anaerovoracaceae	Anaerovorax	NA	0.647507	0
371	Firmicutes	Clostridia	Lachnospirales	Lachnospiraceae	Tyzzerella	NA	0.42297	0
372	Actinobacteriota	Coriobacteriia	OPB41	NA	NA	NA	0.42297	0
373	Spirochaetota	Spirochaetia	Spirochaetales	Spirochaetaceae	Treponema	NA	0.42297	0
374	Cyanobacteria	Cyanobacteriia	Chloroplast	NA	NA	NA	0.42297	0
375	Firmicutes	Bacilli	RF39	NA	NA	NA	0.42297	0
376	Firmicutes	Clostridia	Lachnospirales	Lachnospiraceae	Anaerostignum	NA	0.42297	0
377	Bacteroidota	Bacteroidia	Flavobacteriales	NA	NA	NA	0.42297	0
378	Deferribacterota	Deferribacteres	Deferribacterales	Deferribacteraceae	Mucispirillum	NA	0.42297	0
379	Firmicutes	Clostridia	Lachnospirales	Lachnospiraceae	Tyzzerella	NA	0.42297	0
380	Cyanobacteria	Cyanobacteriia	Synechococcales	Cyanobiaceae	Cyanobium PCC-6307	NA	0.42297	0
381	Bacteroidota	Bacteroidia	Bacteroidales	Rikenellaceae	Alistipes	NA	0.42297	0
382	Firmicutes	Clostridia	Oscillospirales	NA	NA	NA	0.42297	0
383	Firmicutes	Clostridia	Clostridia vadinBB60 group	NA	NA	NA	0.42297	0
384	Firmicutes	Clostridia	Clostridia vadinBB60 group	NA	NA	NA	0.42297	0
385	Firmicutes	Clostridia	Lachnospirales	Lachnospiraceae	Tyzzerella	NA	0.42297	0
386	Firmicutes	Clostridia	Monoglobales	Monoglobaceae	Monoglobus	NA	0.42297	0
387	Proteobacteria	Alphaproteobacteria	Reyranellales	Reyranellaceae	Reyranella	aquatilis	0.42297	0
388	Firmicutes	Clostridia	Lachnospirales	Lachnospiraceae	Tyzzerella	NA	0.375106	0
389	Actinobacteriota	Actinobacteria	PeM15	NA	NA	NA	0.42297	0
390	Proteobacteria	Gammaproteobacteria	Steroidobacterales	Steroidobacteraceae	NA	NA	0.42297	0
391	Firmicutes	Clostridia	Oscillospirales	[Eubacterium] coprostanoligenes group	NA	NA	0.42297	0
392	Firmicutes	Clostridia	Lachnospirales	Lachnospiraceae	Tyzzerella	NA	0.42297	0
393	Bacteroidota	Bacteroidia	Bacteroidales	Rikenellaceae	Rikenella	NA	0.42297	0
394	Firmicutes	Clostridia	Oscillospirales	Ruminococcaceae	NA	NA	0.42297	0
395	Firmicutes	Clostridia	Lachnospirales	Lachnospiraceae	Tyzzerella	NA	0.42297	0
396	Firmicutes	Clostridia	Oscillospirales	Butyricicoccaceae	UCG-009	NA	0.42297	0
397	Firmicutes	Clostridia	NA	NA	NA	NA	0.42297	0
398	Firmicutes	Clostridia	Lachnospirales	Lachnospiraceae	Tyzzerella	NA	0.42297	0
399	Bacteroidota	Bacteroidia	Bacteroidales	Rikenellaceae	Rikenella	NA	0.42297	0
400	Firmicutes	Clostridia	NA	NA	NA	NA	0.42297	0
401	Acidobacteriota	Vicinamibacteria	Subgroup 17	NA	NA	NA	0.42297	0
402	Actinobacteriota	Actinobacteria	Micrococcales	Intrasporangiaceae	Ornithinibacter	aureus	0.42297	0
403	Proteobacteria	Alphaproteobacteria	Rhodospirillales	NA	NA	NA	0.42297	0
404	Bacteroidota	Bacteroidia	Bacteroidales	Rikenellaceae	Alistipes	NA	0.42297	0
405	Deferribacterota	Deferribacteres	Deferribacterales	Deferribacteraceae	Mucispirillum	NA	0.42297	0
406	Cyanobacteria	Cyanobacteriia	Synechococcales	Cyanobiaceae	Cyanobium PCC-6307	NA	0.42297	0
407	Firmicutes	Clostridia	Lachnospirales	Lachnospiraceae	Epulopiscium	NA	0.42297	0
408	Planctomycetota	Planctomycetes	Gemmatales	Gemmataceae	NA	NA	0.42297	0
409	Firmicutes	Clostridia	Monoglobales	Monoglobaceae	Monoglobus	NA	0.42297	0
410	Proteobacteria	Gammaproteobacteria	Pseudomonadales	Pseudomonadaceae	Pseudomonas	NA	0.42297	0
411	Firmicutes	Clostridia	Oscillospirales	Ruminococcaceae	NA	NA	0.42297	0
412	Bacteroidota	Bacteroidia	Bacteroidales	Rikenellaceae	Mucinivorans	NA	0.42297	0
413	Firmicutes	Clostridia	Oscillospirales	Ruminococcaceae	NA	NA	0.42297	0
414	Firmicutes	Clostridia	Oscillospirales	Butyricicoccaceae	UCG-009	NA	0.42297	0
415	Firmicutes	Clostridia	NA	NA	NA	NA	0.42297	0
416	Firmicutes	Clostridia	NA	NA	NA	NA	0.42297	0
417	Planctomycetota	Planctomycetes	Pirellulales	Pirellulaceae	Pirellula	NA	0.42297	0
418	Chloroflexi	KD4-96	NA	NA	NA	NA	0.42297	0
419	Firmicutes	Clostridia	Peptostreptococcales-Tissierellales	NA	NA	NA	0.42297	0
420	Firmicutes	Clostridia	NA	NA	NA	NA	0.42297	0
421	Chloroflexi	KD4-96	NA	NA	NA	NA	0.42297	0
422	Proteobacteria	Alphaproteobacteria	Rhizobiales	Beijerinckiaceae	Methylocystis	NA	0.42297	0
423	Planctomycetota	Phycisphaerae	Phycisphaerales	Phycisphaeraceae	CL500-3	NA	0.42297	0
424	Planctomycetota	Planctomycetes	Pirellulales	Pirellulaceae	Pirellula	NA	0.42297	0
425	Firmicutes	Clostridia	Oscillospirales	Butyricicoccaceae	UCG-009	NA	0.42297	0
426	Planctomycetota	Planctomycetes	Pirellulales	Pirellulaceae	Pir4 lineage	NA	0.42297	0
427	Bacteroidota	Bacteroidia	Flavobacteriales	NA	NA	NA	0.42297	0
428	Patescibacteria	Saccharimonadia	Saccharimonadales	NA	NA	NA	0.42297	0
429	Proteobacteria	Gammaproteobacteria	Diplorickettsiales	Diplorickettsiaceae	Aquicella	NA	0.42297	0
430	Deferribacterota	Deferribacteres	Deferribacterales	Deferribacteraceae	Mucispirillum	NA	0.42297	0
431	Verrucomicrobiota	Chlamydiae	Chlamydiales	Parachlamydiaceae	Candidatus Protochlamydia	NA	0.42297	0
432	Actinobacteriota	Actinobacteria	Corynebacteriales	Mycobacteriaceae	Mycobacterium	NA	0.42297	0
433	Firmicutes	Clostridia	Lachnospirales	Lachnospiraceae	Tyzzerella	NA	0.42297	0
434	Actinobacteriota	Actinobacteria	Micrococcales	Microbacteriaceae	NA	NA	0.42297	0
435	Proteobacteria	Alphaproteobacteria	Reyranellales	Reyranellaceae	Reyranella	NA	0.42297	0
436	Firmicutes	Negativicutes	Acidaminococcales	Acidaminococcaceae	Succinispira	NA	0.42297	0
